# Supplementary material for: Nano-titania modified cupric-based metal–organic frameworks for the on-line pass-through cleanup of phenothiazine drugs and metabolites in human plasma
Source: Royal Society of Chemistry journal article supplement (doi:10.1039/d2nj01575g), 2022-01-01
Supplement: d2nj01575g1.pdf [file d2nj01575g1.pdf]

### Supplementary information

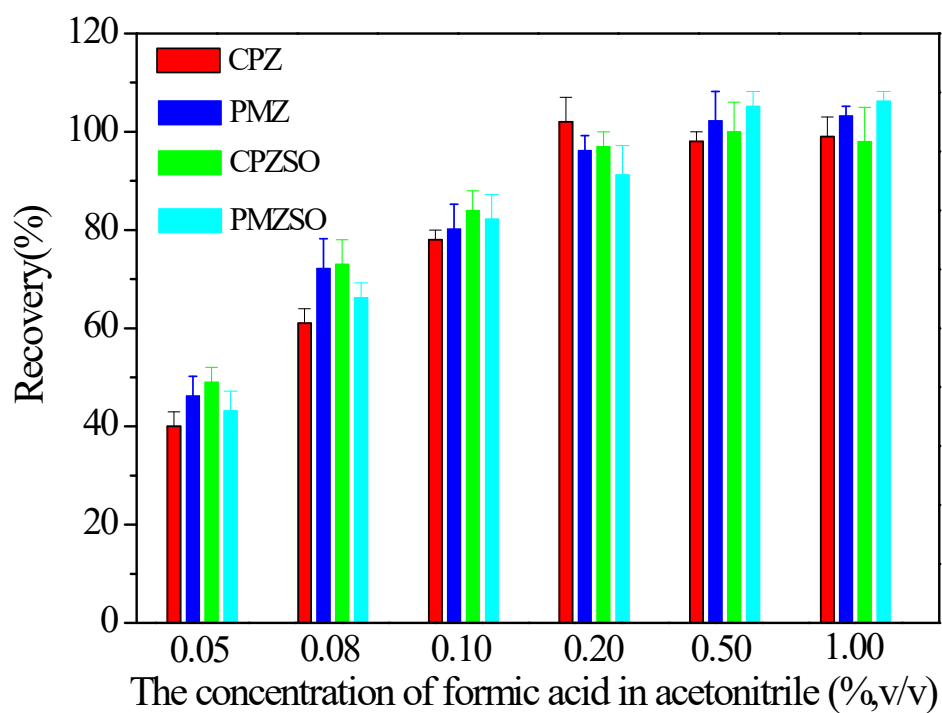

**Fig. S1** Effect of the concentration of formic acid in acetonitrile on the recoveries of CPZ, PMZ, CPZSO and PMZSO.

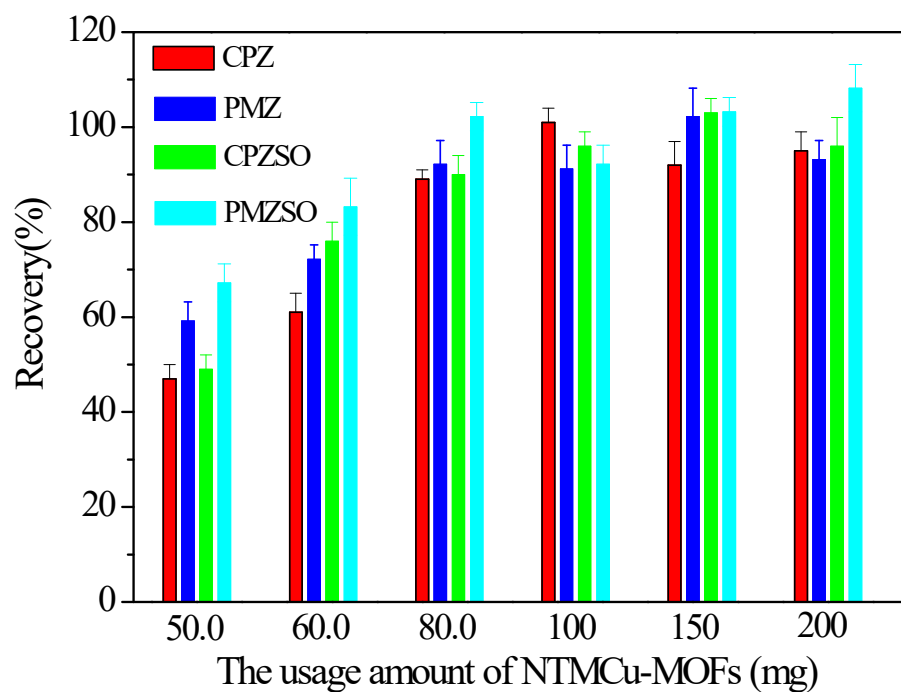

**Fig. S2** Effect of the usage amount of NTMCu-MOFs on the recoveries of CPZ, PMZ,

CPZSO and PMZSO

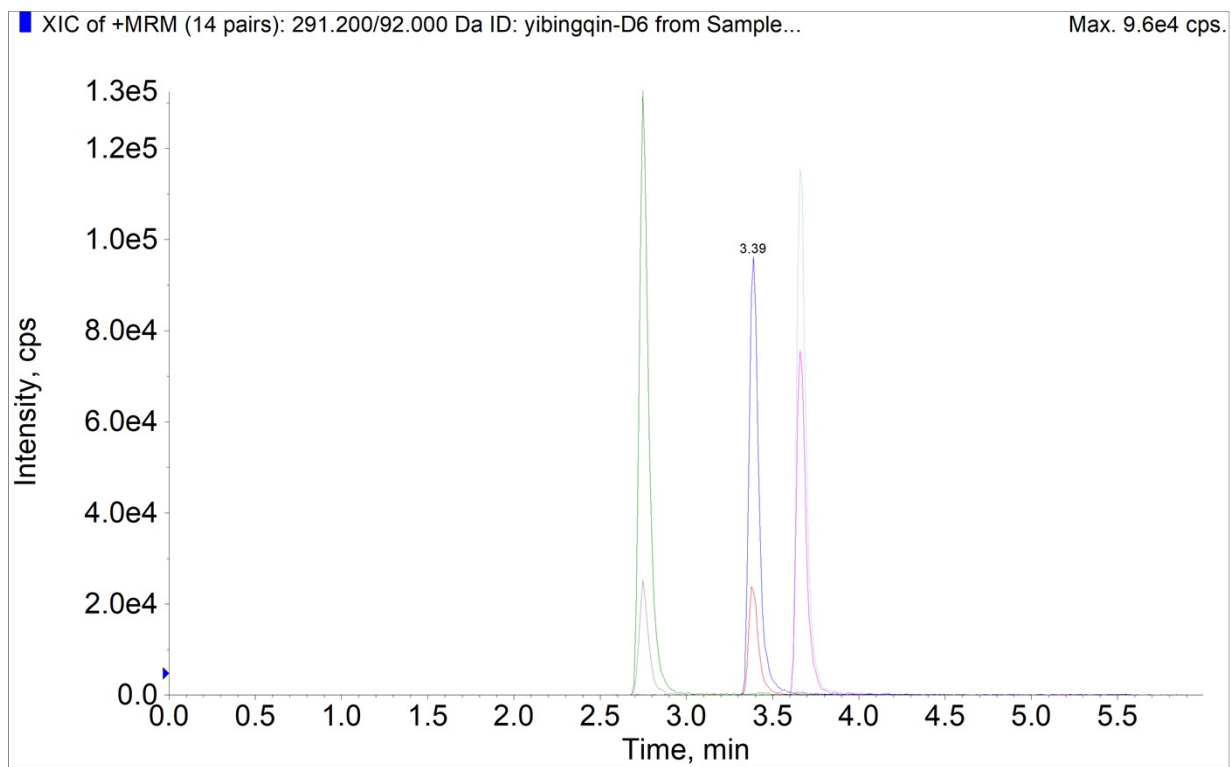

**Fig. S3** MRM chromatograms for the blank human plasma.

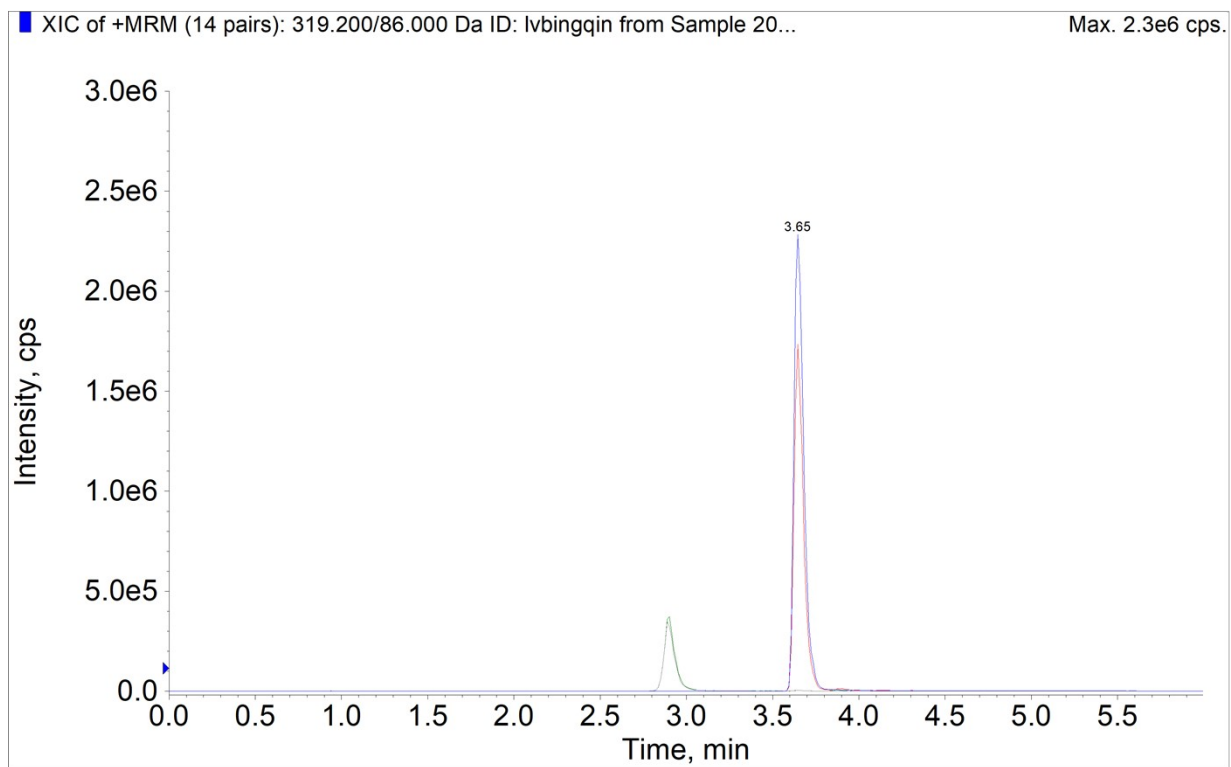

**Fig. S4** The MRM chromatograms for one typical sample.

**Table S1** Comparison of the analytical features of current LC-MS based methodologies for the determination of phenothiazine drugs. in various matrices

| Sample       | Analytes                                                                            | Sample preparation (main steps)                   | LC column                                                           | LC parameters                                                                                                                                                     | Method LOQ            | Reference |
|--------------|-------------------------------------------------------------------------------------|---------------------------------------------------|---------------------------------------------------------------------|-------------------------------------------------------------------------------------------------------------------------------------------------------------------|-----------------------|-----------|
| Human plasma | Chlorpromazine, olanzapine, quetiapine, et al. antipsychotics                       | Disposable pipette extraction                     | XSelects CSH C18 (2.5 $\mu$ m, 2.1 $\times$ 100 mm)                 | Mobile phase: ammonium acetate solution 5 mmol/L (with formic acid 0.1%) and acetonitrile with gradient elution, 0.30 mL/min, injection volume: 5 $\mu$ L         | 0.5~20 $\mu$ g/L      | [30]      |
| Human plasma | Chlorpromazine, olanzapine, quetiapine, et al. antipsychotics                       | Liquid liquid extraction                          | XSelects CSH C18 (2.5 $\mu$ m, 2.1 $\times$ 100 mm)                 | Mobile phase: ammonium acetate solution 5 mmol/L (with formic acid 0.1%) and acetonitrile with gradient elution, 0.30 mL/min, injection volume: 10 $\mu$ L        | 0.2~5.0 $\mu$ g/L     | [31]      |
| Human plasma | Chlorpromazine, olanzapine, quetiapine, et al. antipsychotics                       | Microextraction by packed sorbent                 | XSelects CSH C18 (2.5 $\mu$ m, 2.1 $\times$ 100 mm)                 | Mobile phase: ammonium acetate solution 5 mmol/L (with formic acid 0.1%) and acetonitrile with gradient elution, 0.30 mL/min, injection volume: 10 $\mu$ L        | 0.05~1.0 $\mu$ g/L    | [32]      |
| Human plasma | Chlorpromazine, promethazine, chlorpromazine sulphoxide, and promethazine sulfoxide | NTMCu-MOFs on-line pass-through cleanup procedure | ACQUITY UPLC <sup>®</sup> HSS T3(1.8 $\mu$ m, 100mm $\times$ 2.1mm) | Mobile phase: 0.1% formic acid (v/v) in acetonitrile (A) and 0.1% formic acid (v/v) in water (B) with gradient elution, 0.35 mL/min, injection volume: 10 $\mu$ L | 0.040-0.079 $\mu$ g/L | This work |
